# Supplementary material
Source: PubMed Central journal article supplement (PMC3150595)
Supplement: NIHMS313006-supplement-2.pdf [file NIHMS313006-supplement-2.pdf]

**a**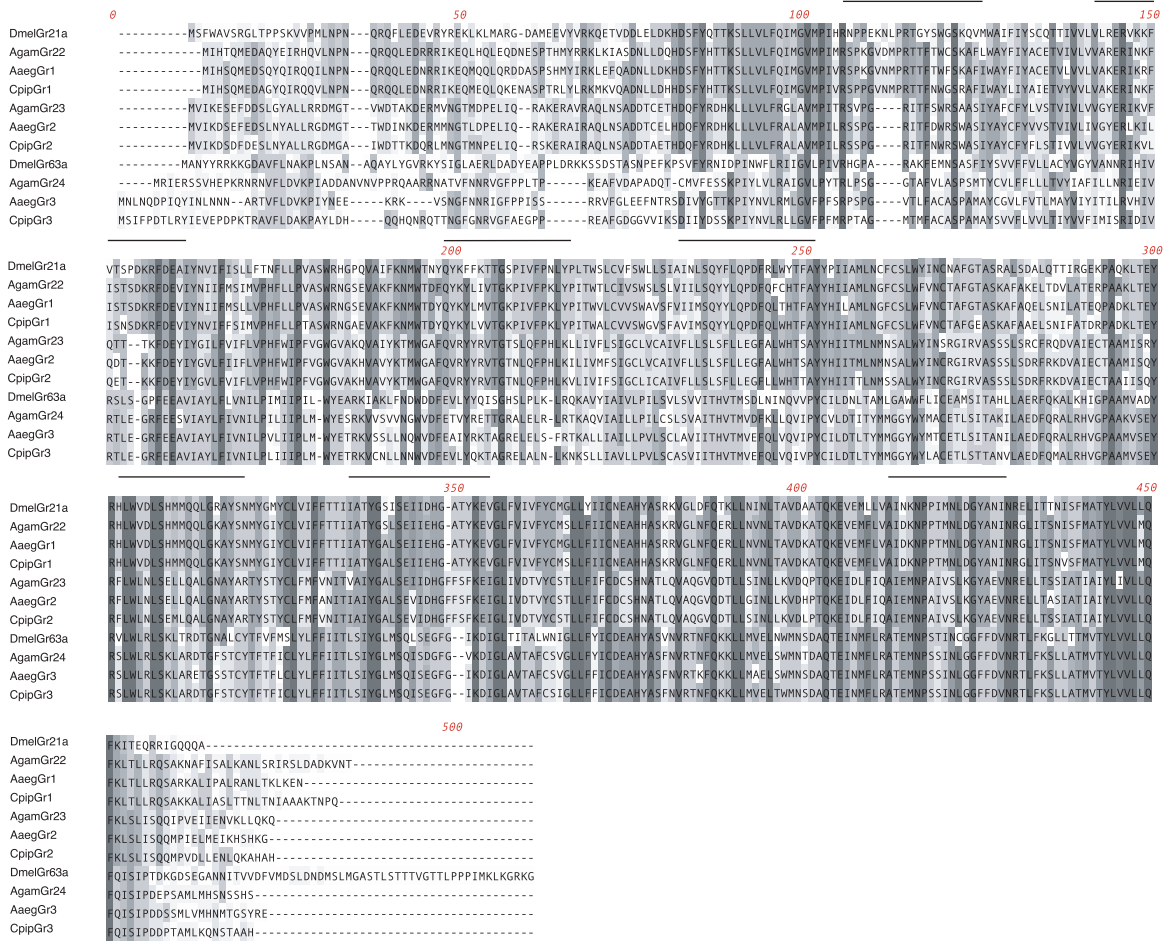**b**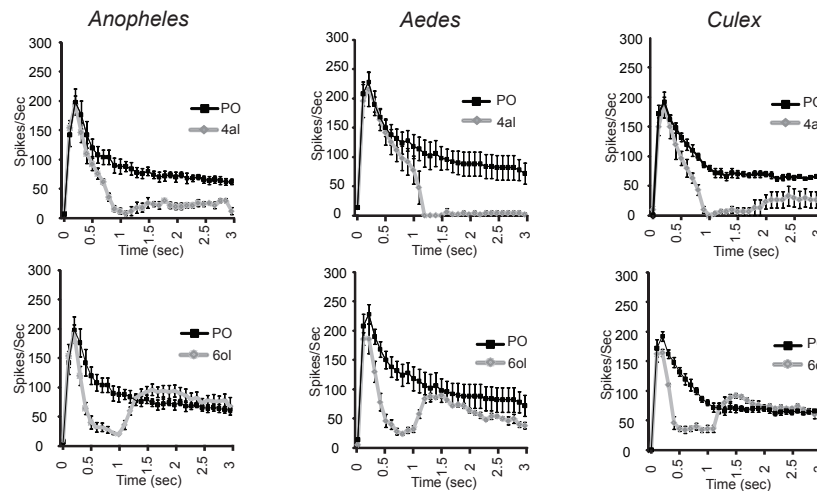

### Supplemental figure 1: CO<sub>2</sub> receptors are highly conserved in insects.

**a**, Alignment of the amino acid sequences of CO<sub>2</sub> receptor orthologs using ClustalW from *D. melanogaster* (Dmel), *A. gambiae* (Agam), *A. aegypti* (Aaeg) and *C. quinquefasciatus* (Cpip). Recreated using sequences from Robertson et. al. 2009.

**b**, Mean spikes per second of cpA neuron for 3-sec stimulus of 0.15% CO<sub>2</sub> overlaid with 0.5-sec odour, counted in 100-msec bins, n=5, error bars=s.e.m.

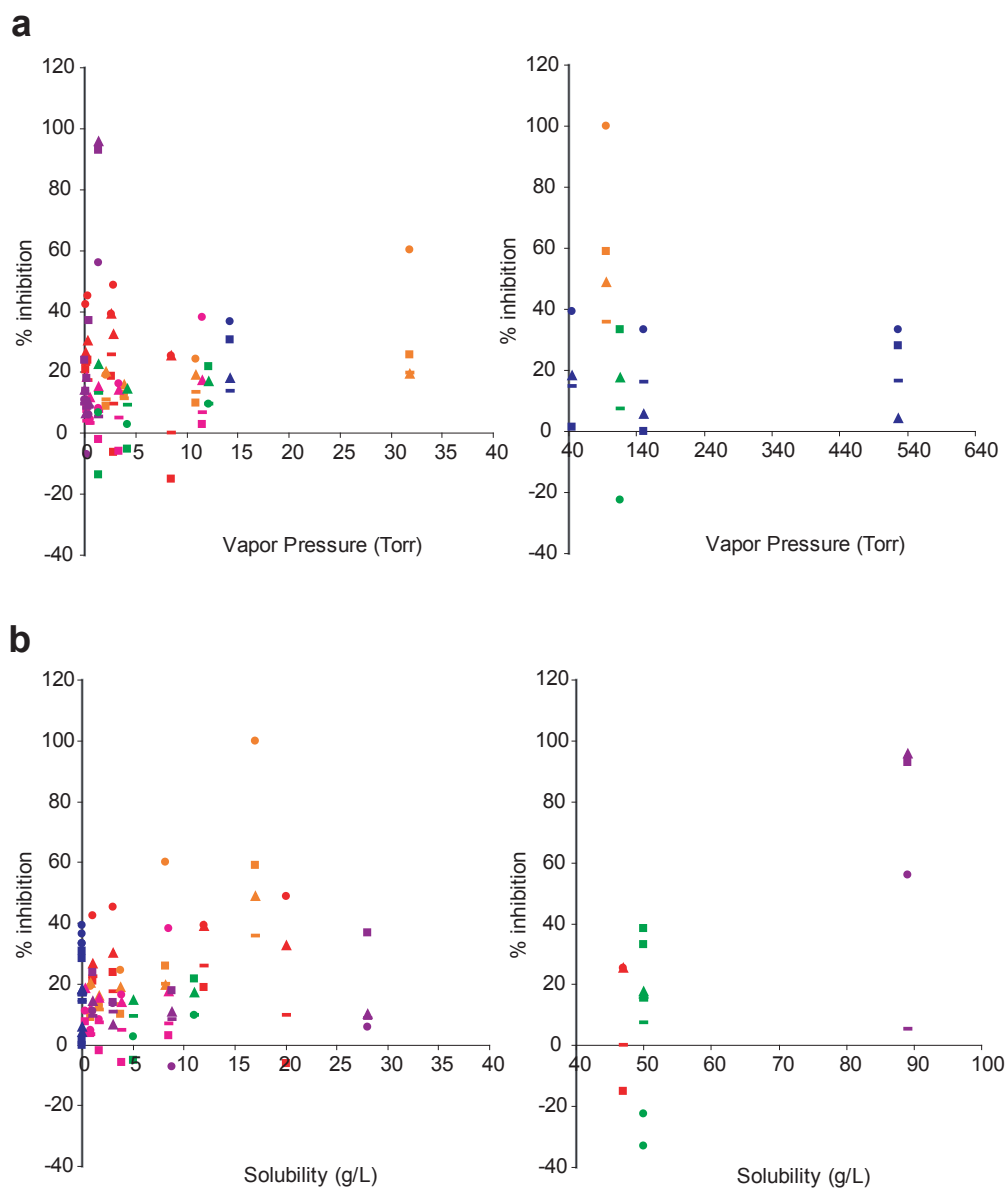

**Supplemental figure 2: Volatility and solubility of CO<sub>2</sub> response inhibitors**

Percentage inhibition of the CO<sub>2</sub> response as a function of **a**, vapor pressure, or **b**, solubility. Information obtained using Scifinder Scholar. Differing shapes indicate same compounds across different insects; *A. gambiae* (□), *A. aegypti* (▲), *C. quinquefasciatus* (—), *D. melanogaster* (◇). Differing colors indicate chemical class; alcohol (red), aldehyde (orange), ester (pink), alkane (blue), ketone (green), acid (purple). n=3.

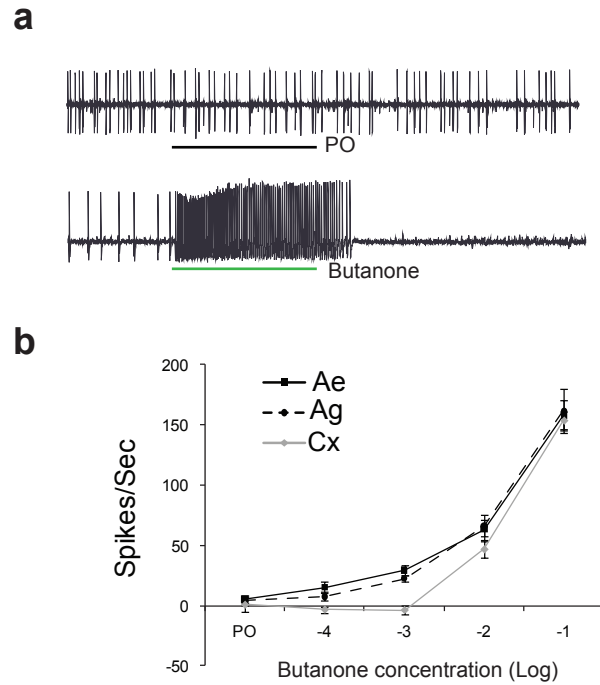

**Supplemental figure 3: Butanone activates cpA neuron in mosquito and mimics CO<sub>2</sub>.**

**a**, Representative trace from *A. gambiae* peg sensillum to a 1-sec stimulus of solvent (PO) or 2-butanone ( $10^{-1}$  dilution). **b**, Mean responses of the cpA neuron to 1-sec 2-butanone at indicated dilutions on *A. gambiae* (Ag), *A. aegypti* (Ae), and *C. quinquefasciatus* (Cx). n=5, error bars=s.e.m.

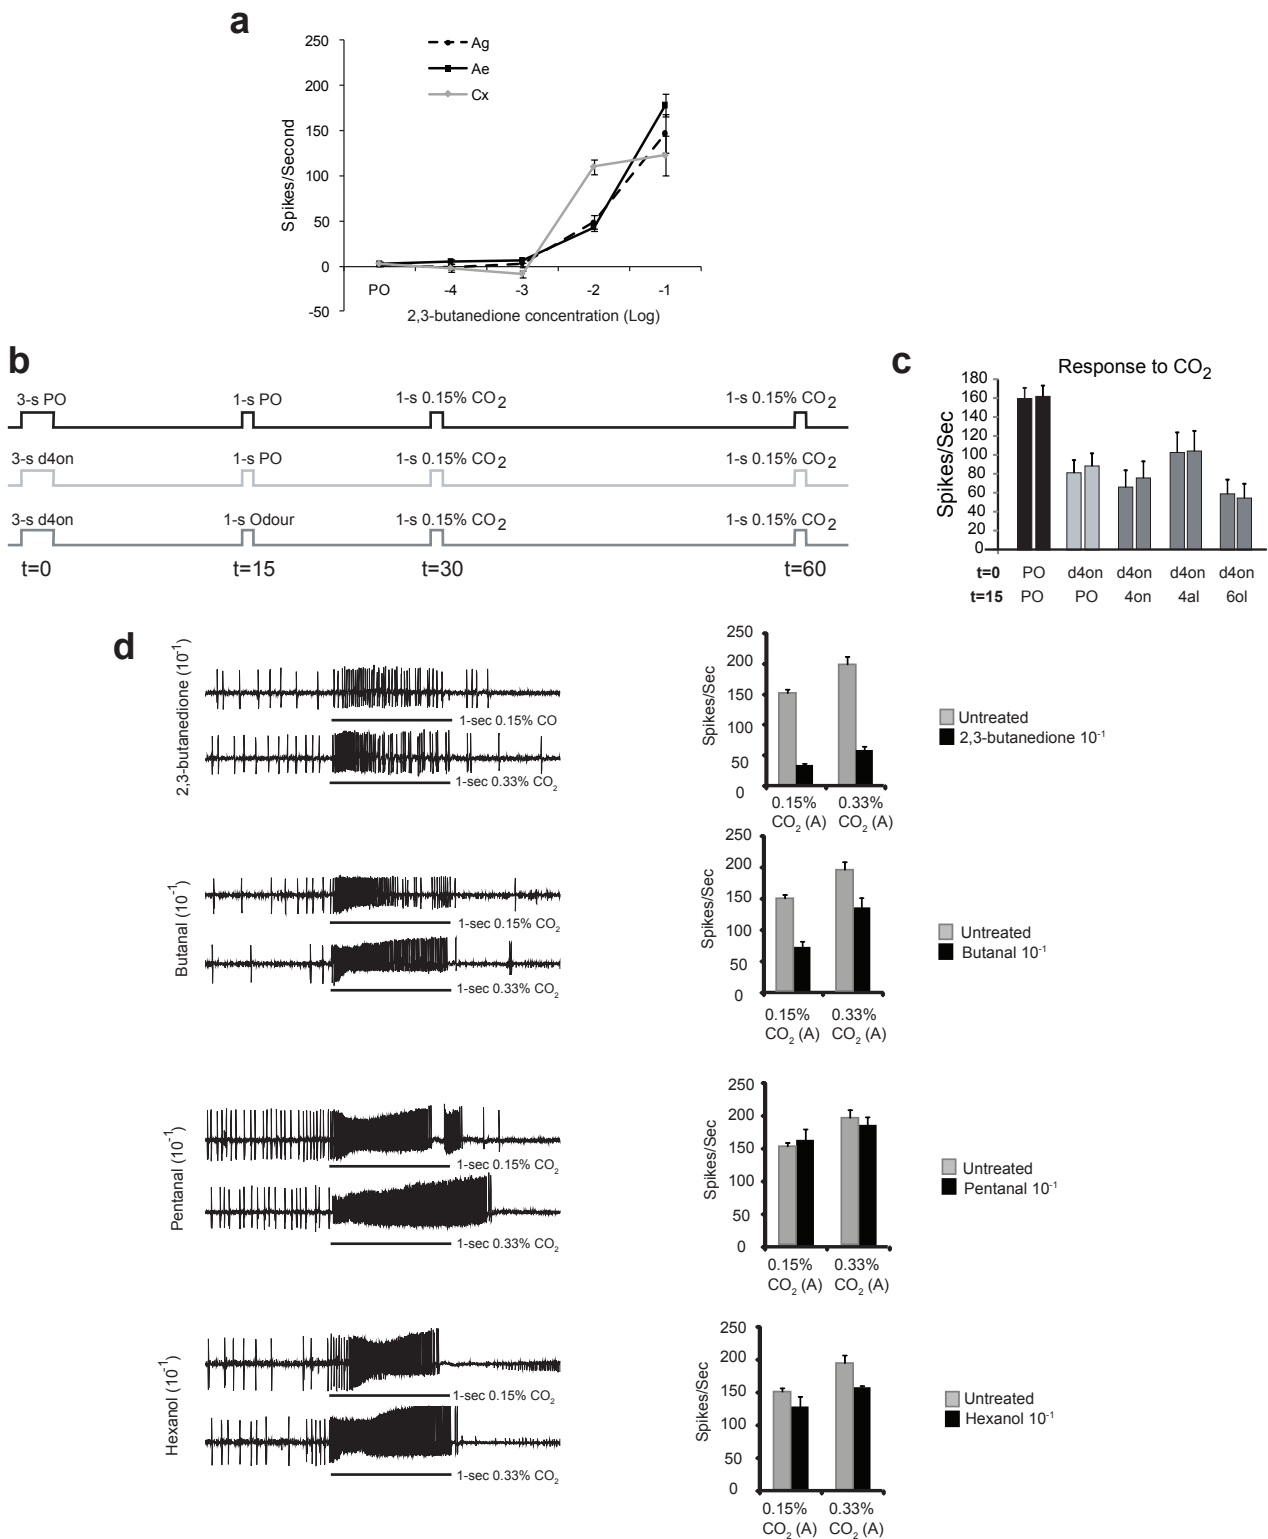

**Supplemental Figure 4: Effect of individual odour mixture components on ultra-prolonged activation.**

**a**, Mean responses of the cpA neuron to 1-sec 2,3-butanedione at indicated dilutions on *A. gambiae* (Ag), *A. aegypti* (Ae), and *C. quinquefasciatus* (Cx). n=5. error bars=s.e.m. **b**, Schematic of odour exposure sequence. **c**, Mean response of *A. aegypti* cpA neuron to a 1-sec CO<sub>2</sub> stimulus after pre-exposure as indicated on X-axis with odorants at t=0 and t=15 sec. **d**, Representative traces (left) from peg sensillum and mean responses (right) from the cpA neurons to 0.15% and 0.33% CO<sub>2</sub> after a pretreatment to 3-min of paraffin oil, or individual odour mixture components indicated. n=5, error bars=s.e.m.



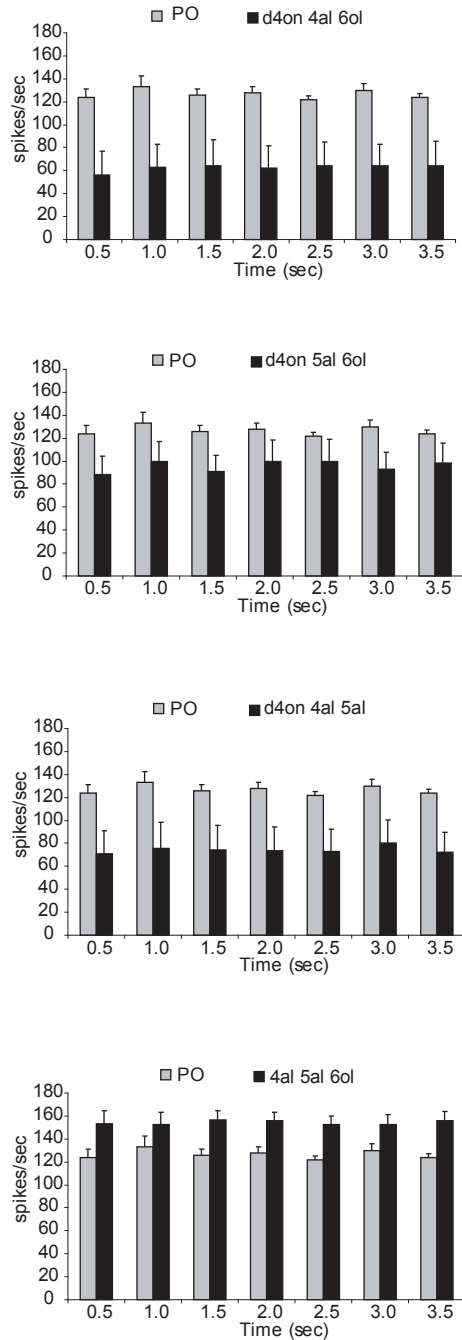

**Supplemental figure 5: Long-term Inhibition of CO<sub>2</sub> response in *A. aegypti* after pre-exposure to combinations of odorants.**

Mean increase in frequency of response of the cpA neuron to stimulus of 1-sec 0.15% CO<sub>2</sub> applied approx. every 30-sec, following a 3-sec pre-exposure to odor mixtures (10<sup>-2</sup> dilution) or paraffin oil (PO). d4on=2,3-butanedione, 4al=butanal, 5al=pentanal, 6ol=hexanol. n=5, error bars=s.e.m. Spontaneous activity subtracted.

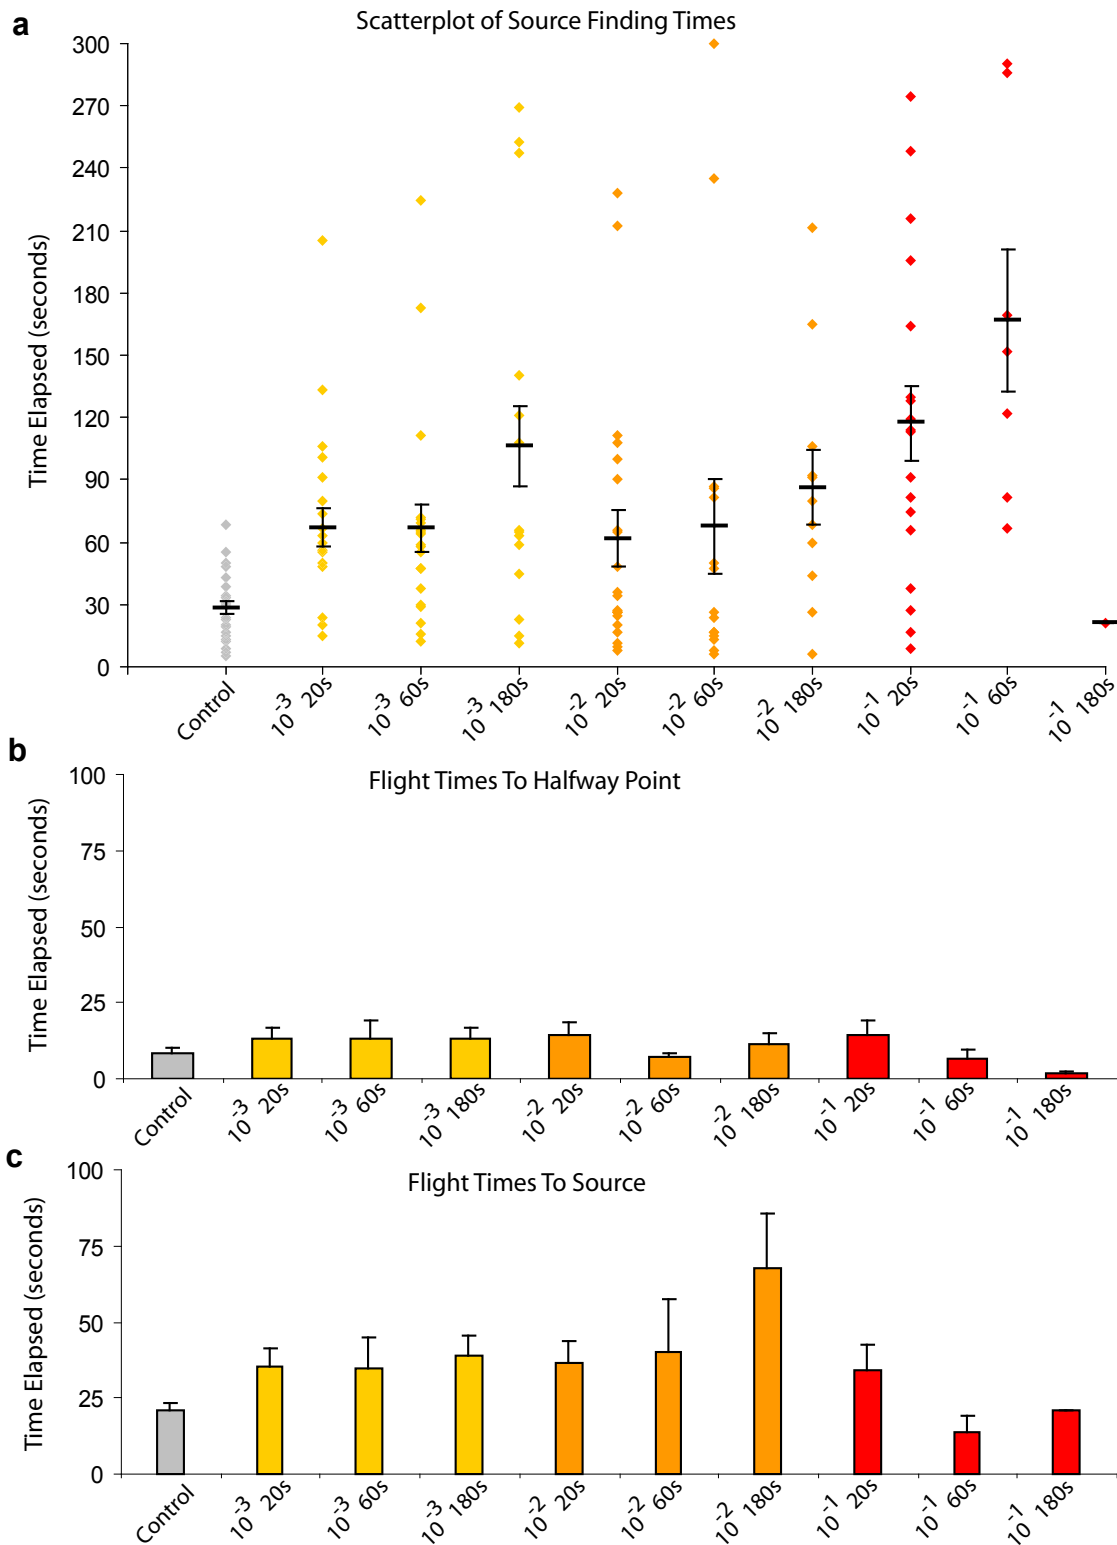

**Supplemental figure 6: Behavior disruption in wind-tunnel**

**a**, Scatterplot of time elapsed from start of assay required to find CO<sub>2</sub> source for individual female *Aedes* mosquitoes according to the various ultra-prolonged blend treatments as indicated. Mosquitoes that did not find source are not included. Mean times and s.e.m. are indicated with line and error bars. **b**, Mean flight-time (after takeoff from holding cage) to the half-way point, and **c**, mean flight-time (after takeoff from holding cage) to the CO<sub>2</sub> source. Error bars =s.e.m. Note the data for the 10<sup>-1</sup> pre-exposure for 60-sec and 180-sec are severely skewed since very few individuals performed the behaviour, only 1 in the last condition. N=26 individuals for each condition were tested.

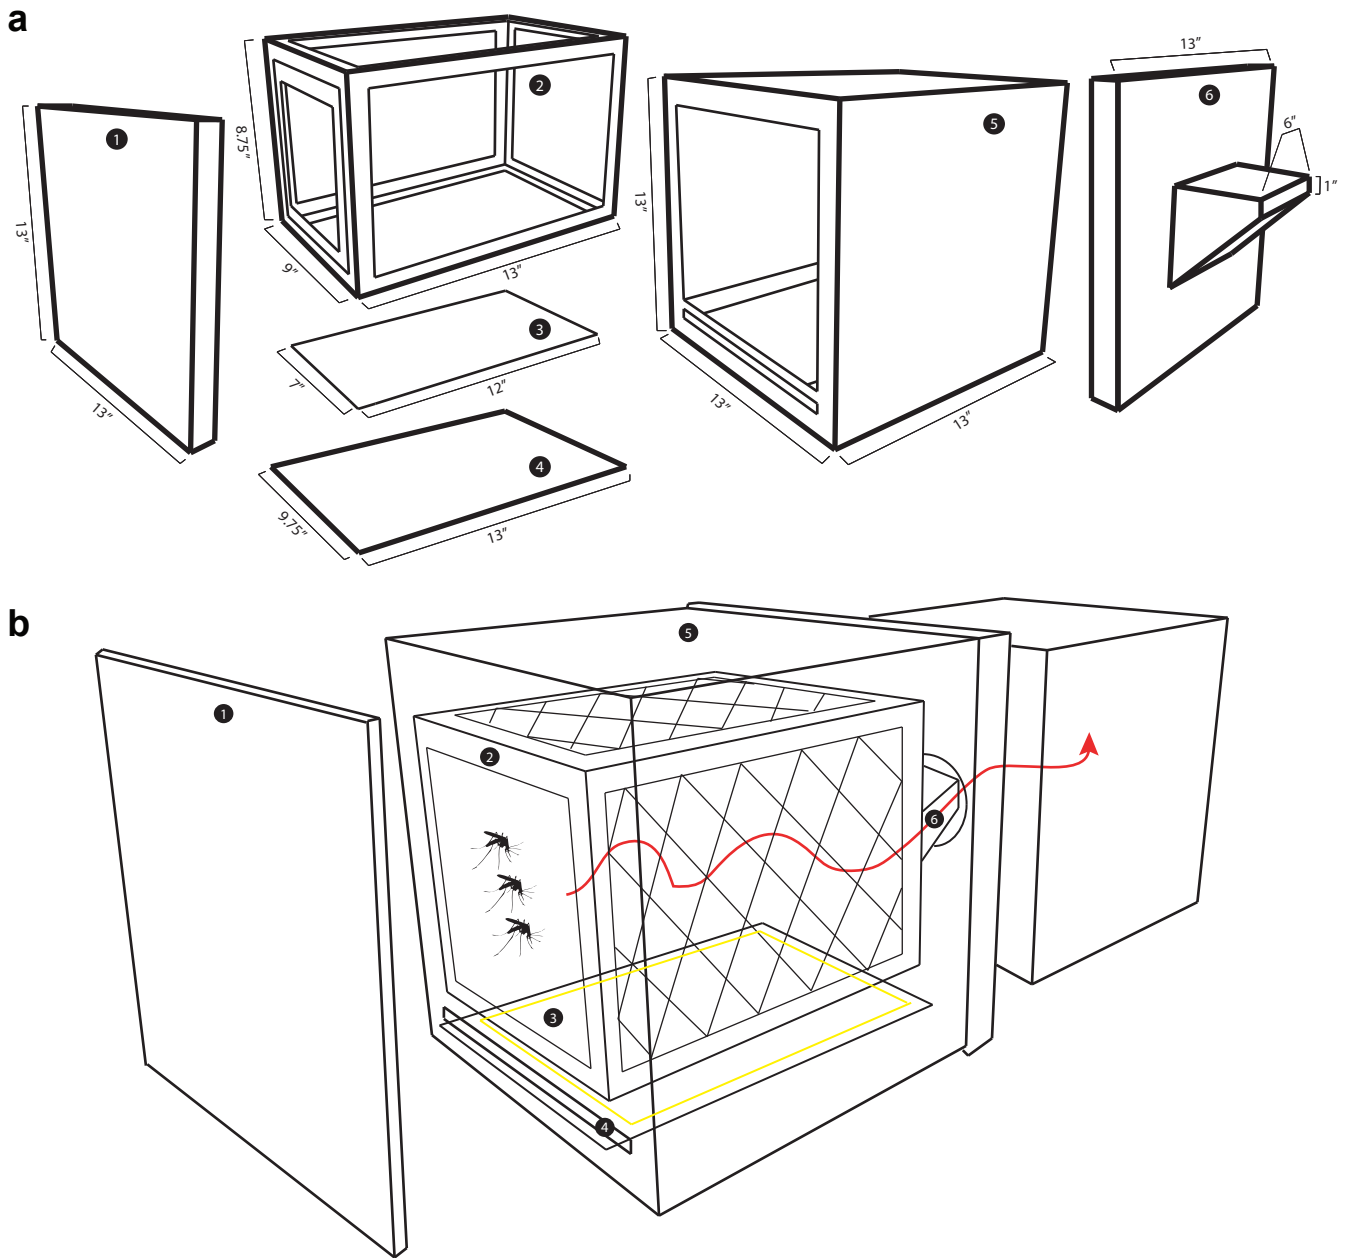

**Supplemental Figure 7:**

**a,b** Schematic diagram of the components of the stainless steel repelency chamber and use for the DEET avoidance assay.

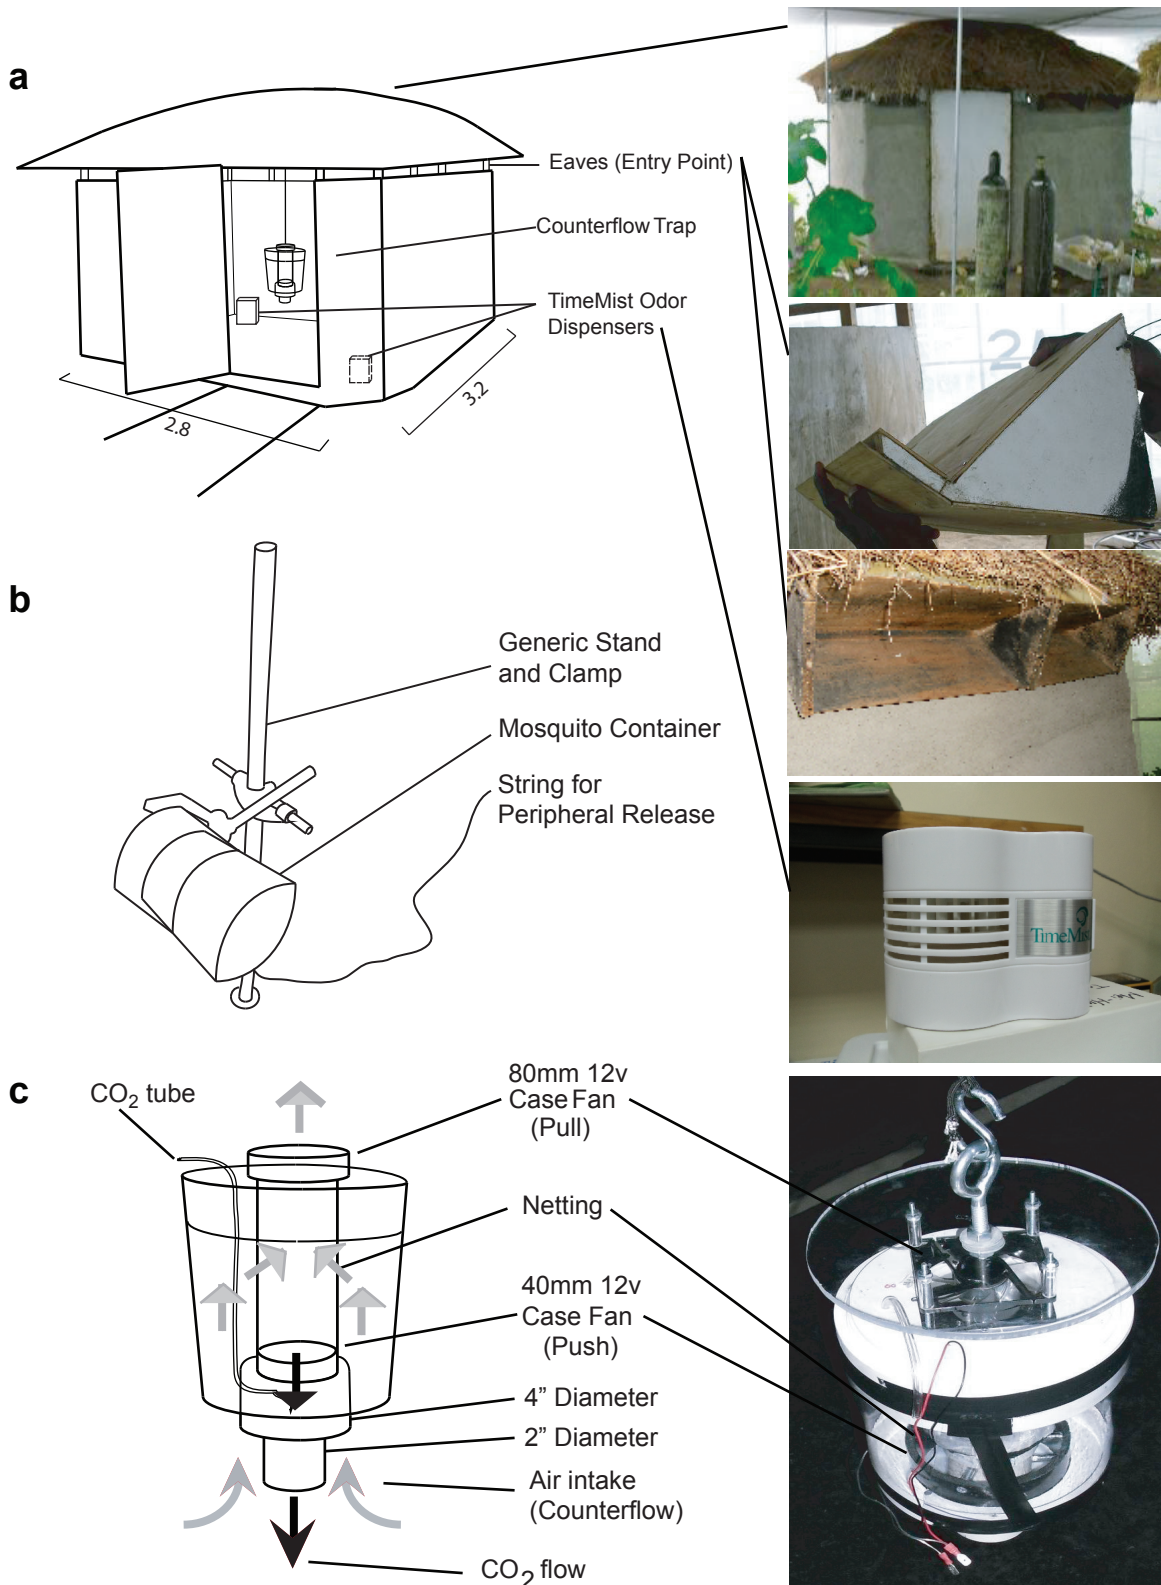

**Supplemental Figure 8:**

Schematic and pictures of the **a**, experimental hut inside MalariaSphere with close-up pictures of the one-way entry traps installed in the eaves and TimeMist odour; **b**, remote mosquito release system; **c**, counter-flow geometry trap.

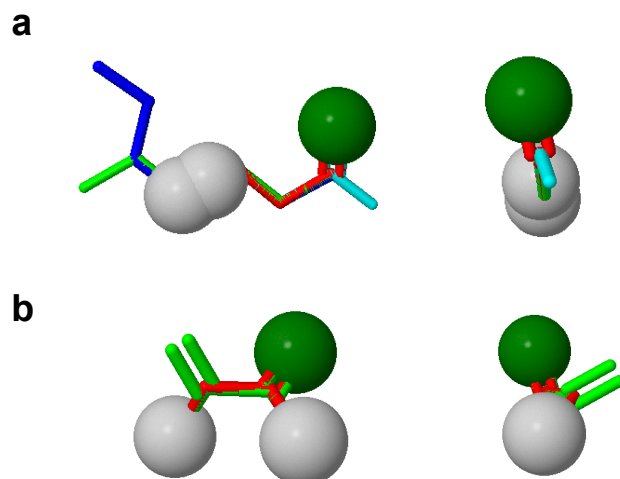

**Supplemental Figure 9:**

Pharmacophores of **a**, antagonists (1-hexanol, 1-pentanol, 1-butanal, 1-butanoic acid), and **b**, agonists (2-butanone and 2,3-butanedione). Pharmacophores are shown in two orientations at right-angles. Grey=hydrophobic, green=acceptors. Pharmacophores generated using PharmaGist program as described in Inbar, Y., et. al.. Deterministic Pharmacophore Detection via Multiple Flexible Alignment of Drug-Like Molecules. In Proc. of RECOMB (2007), vol. 3692 of Lecture Notes in Computer Science, pp. 423-434. Springer Verlag.

**Table 1a: Greenhouse Counter-flow Trapping Assay**

| Treatment                                 | Solvent<br>(Paraffin oil) | 2,3-butanedione<br>(0.1%) | 2,3-butanedione<br>(0.01%) | CO <sub>2</sub><br>(250ml/min) |
|-------------------------------------------|---------------------------|---------------------------|----------------------------|--------------------------------|
| Percentage of released mosquitoes trapped | 19.2±5.7%                 | 14±3%                     | 9.2±2.3%                   | 63.7±8.8%                      |

**Table 1b: Wind Tunnel Assay**

| Treatment                                               | Solvent<br>(Paraffin oil) | 2,3-butanedione<br>(0.1%) | CO <sub>2</sub><br>(1%) |
|---------------------------------------------------------|---------------------------|---------------------------|-------------------------|
| Percentage of mosquitoes finding CO <sub>2</sub> source | 0%                        | 0%                        | 100%                    |

**Supplemental Table 1:**

**a**, Percentage of female *C. quinquefasciatus* mosquitoes trapped overnight in a counter-flow geometry trap using the indicated lures. N=5 trials per lure treatment, 50 mosquitoes/trial. **b**, Percentage of female *C. quinquefasciatus* mosquitoes flying through the odor emitting ring upwind in wind-tunnel assays. N= 20 per trial.
