# Supplementary material
Source: PubMed Central journal article supplement (PMC3150595)

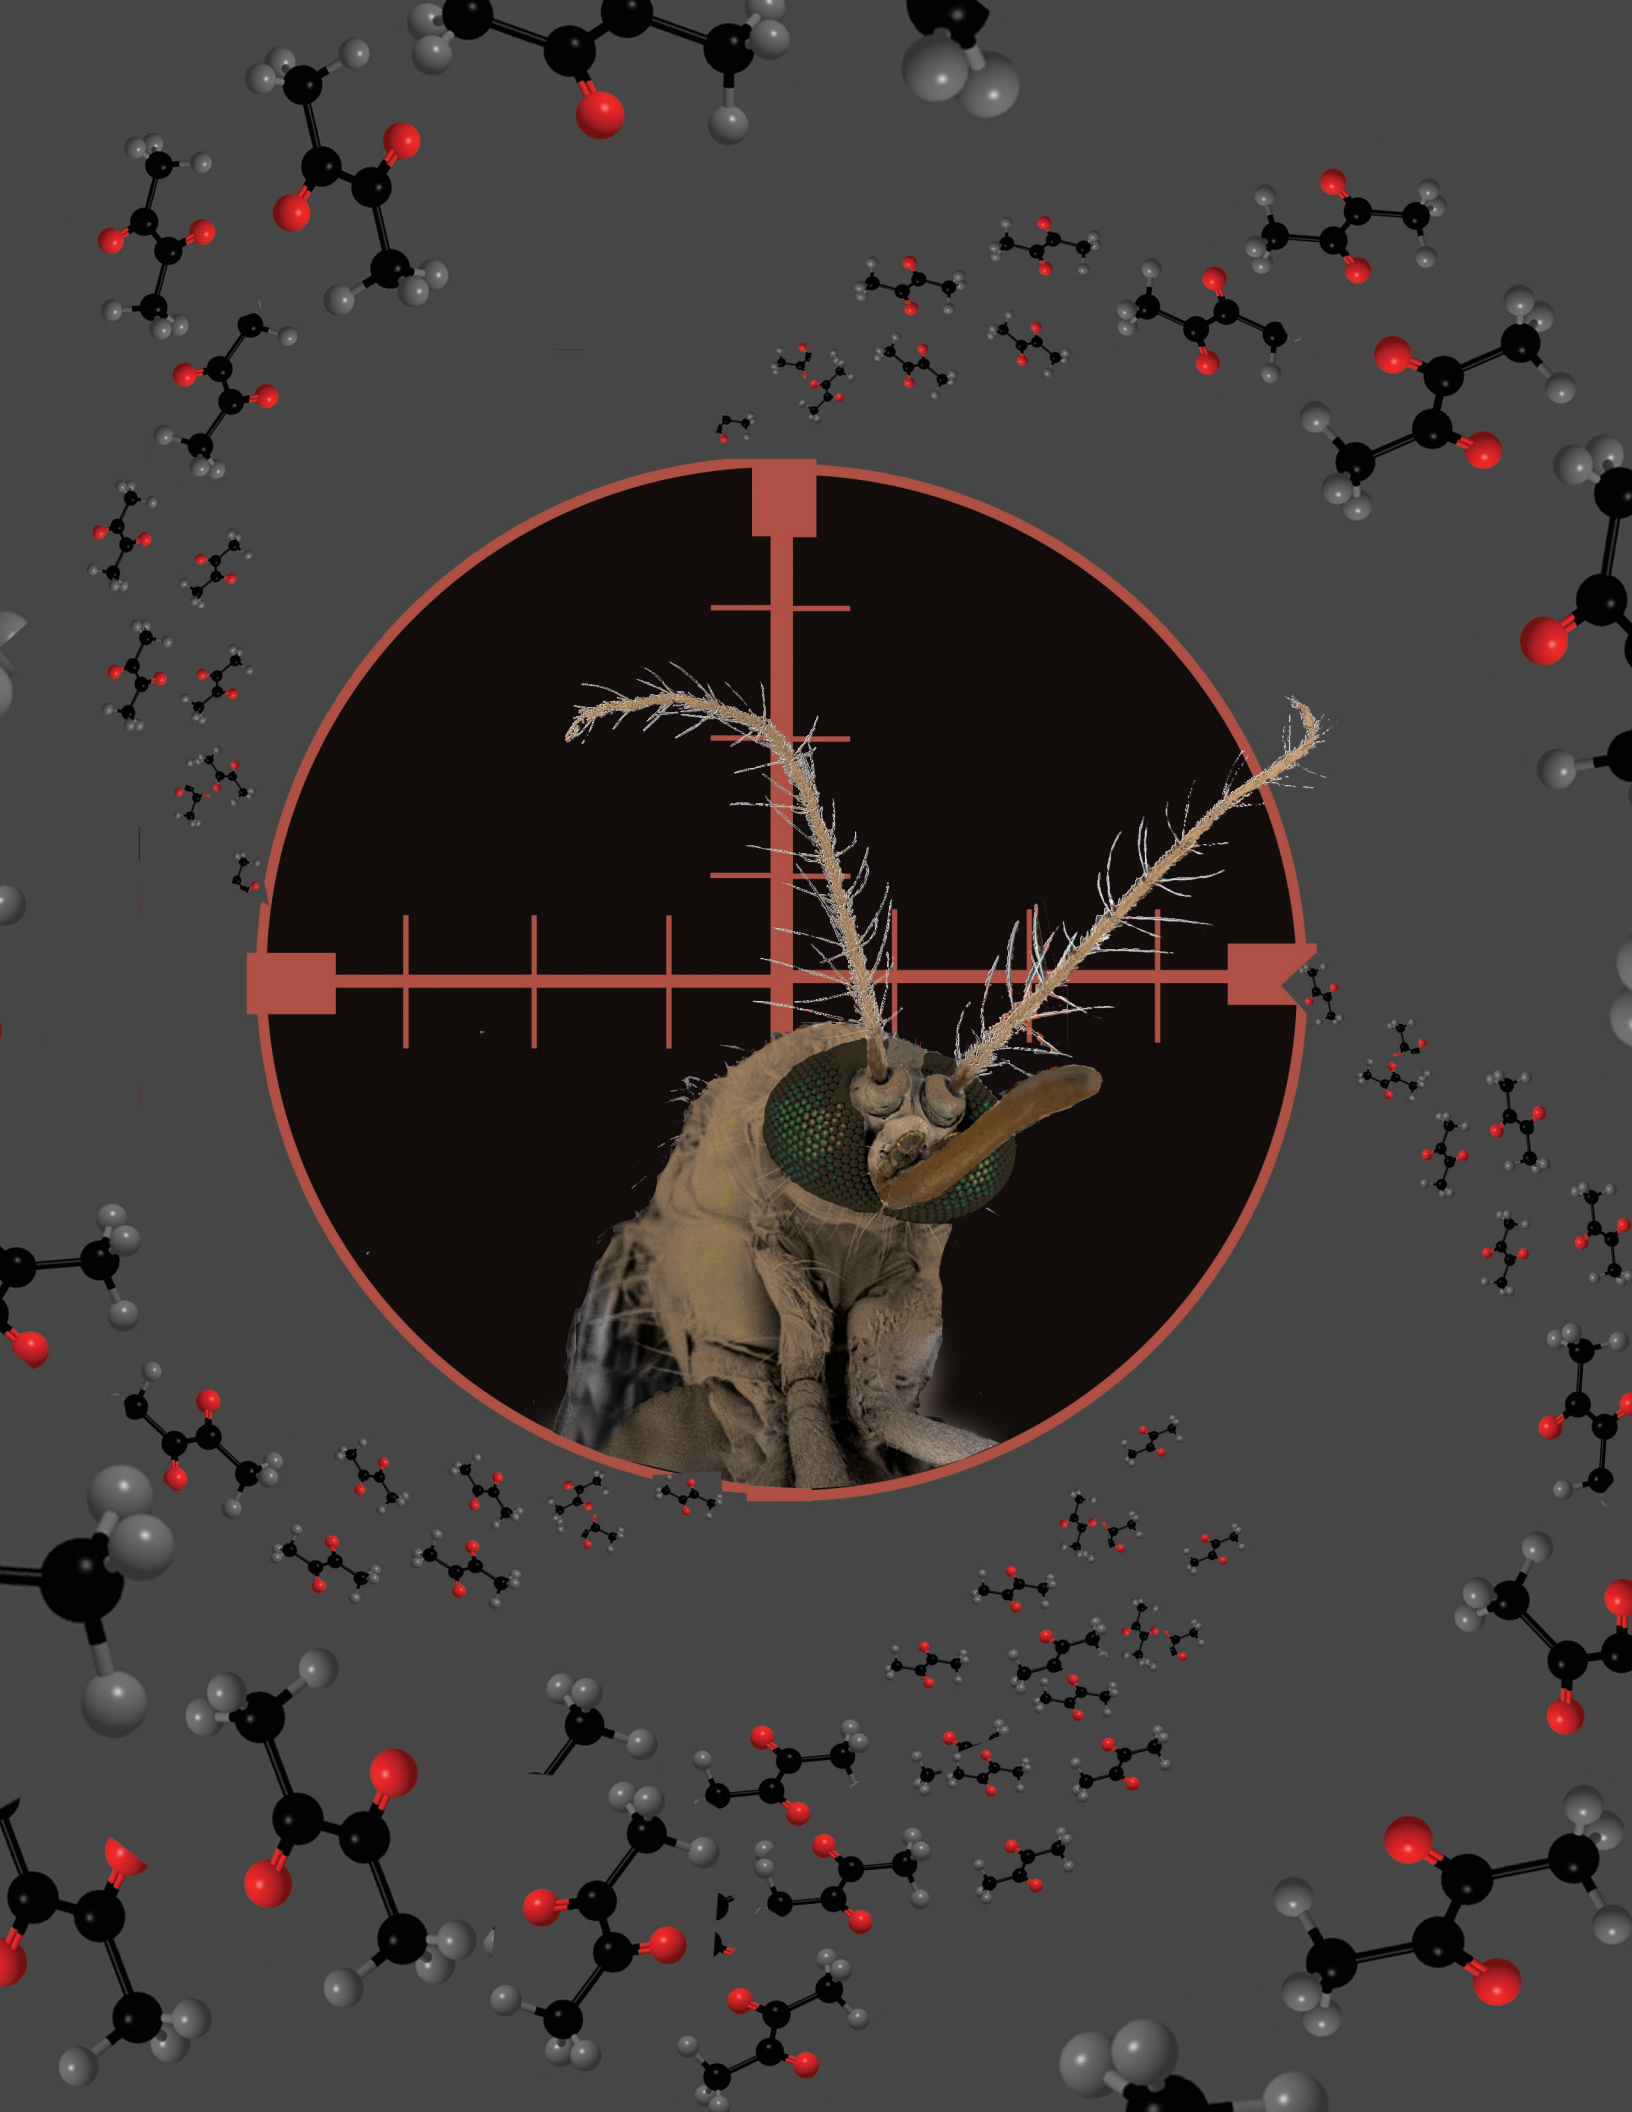

Supplement: NIHMS313006-supplement-5.pdf [file NIHMS313006-supplement-5.pdf]

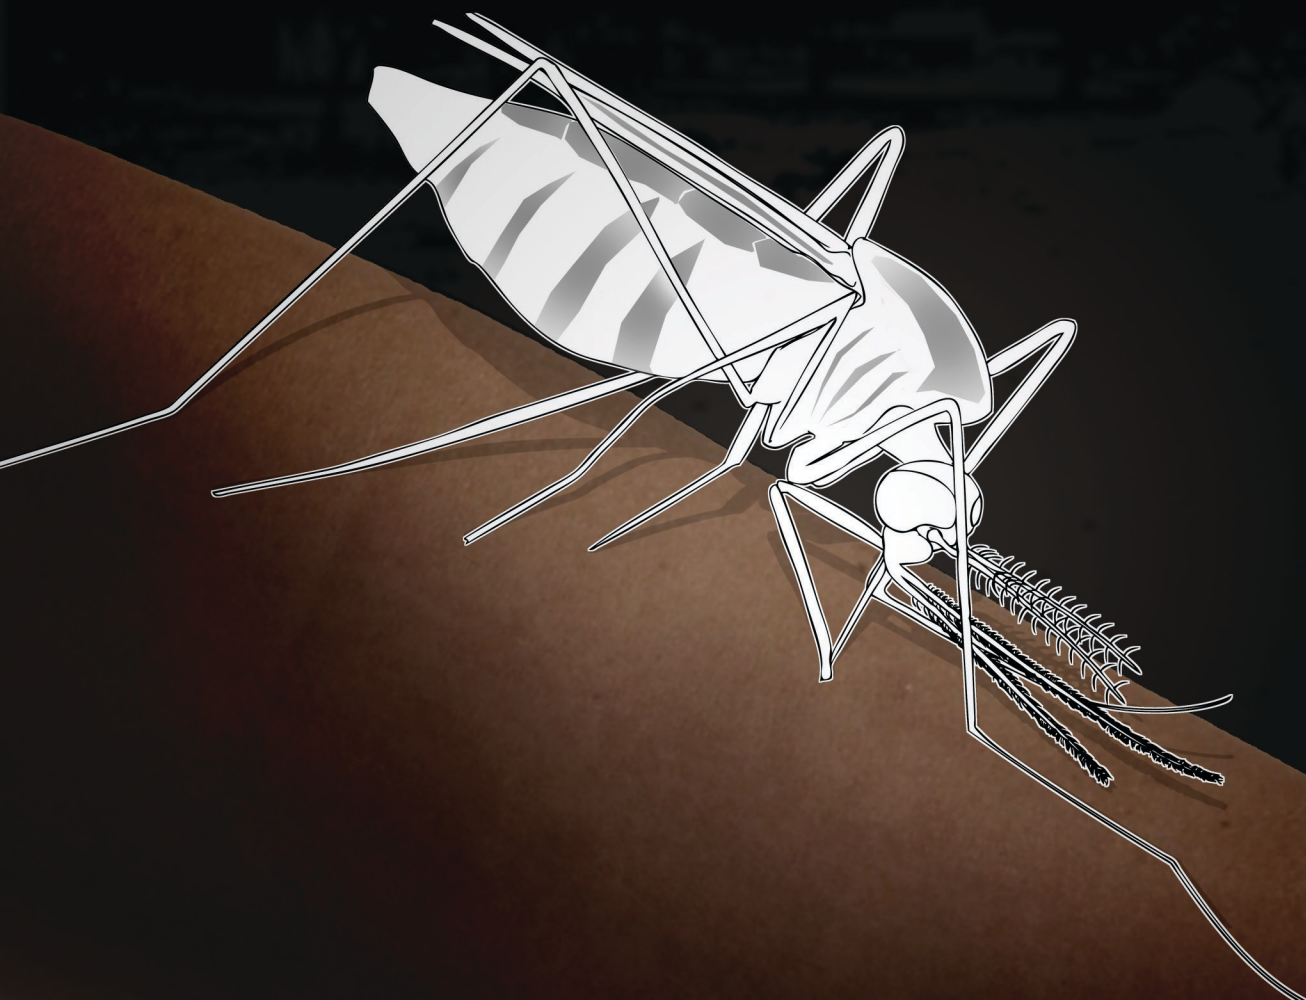

Supplement: NIHMS313006-supplement-6.pdf [file NIHMS313006-supplement-6.pdf]

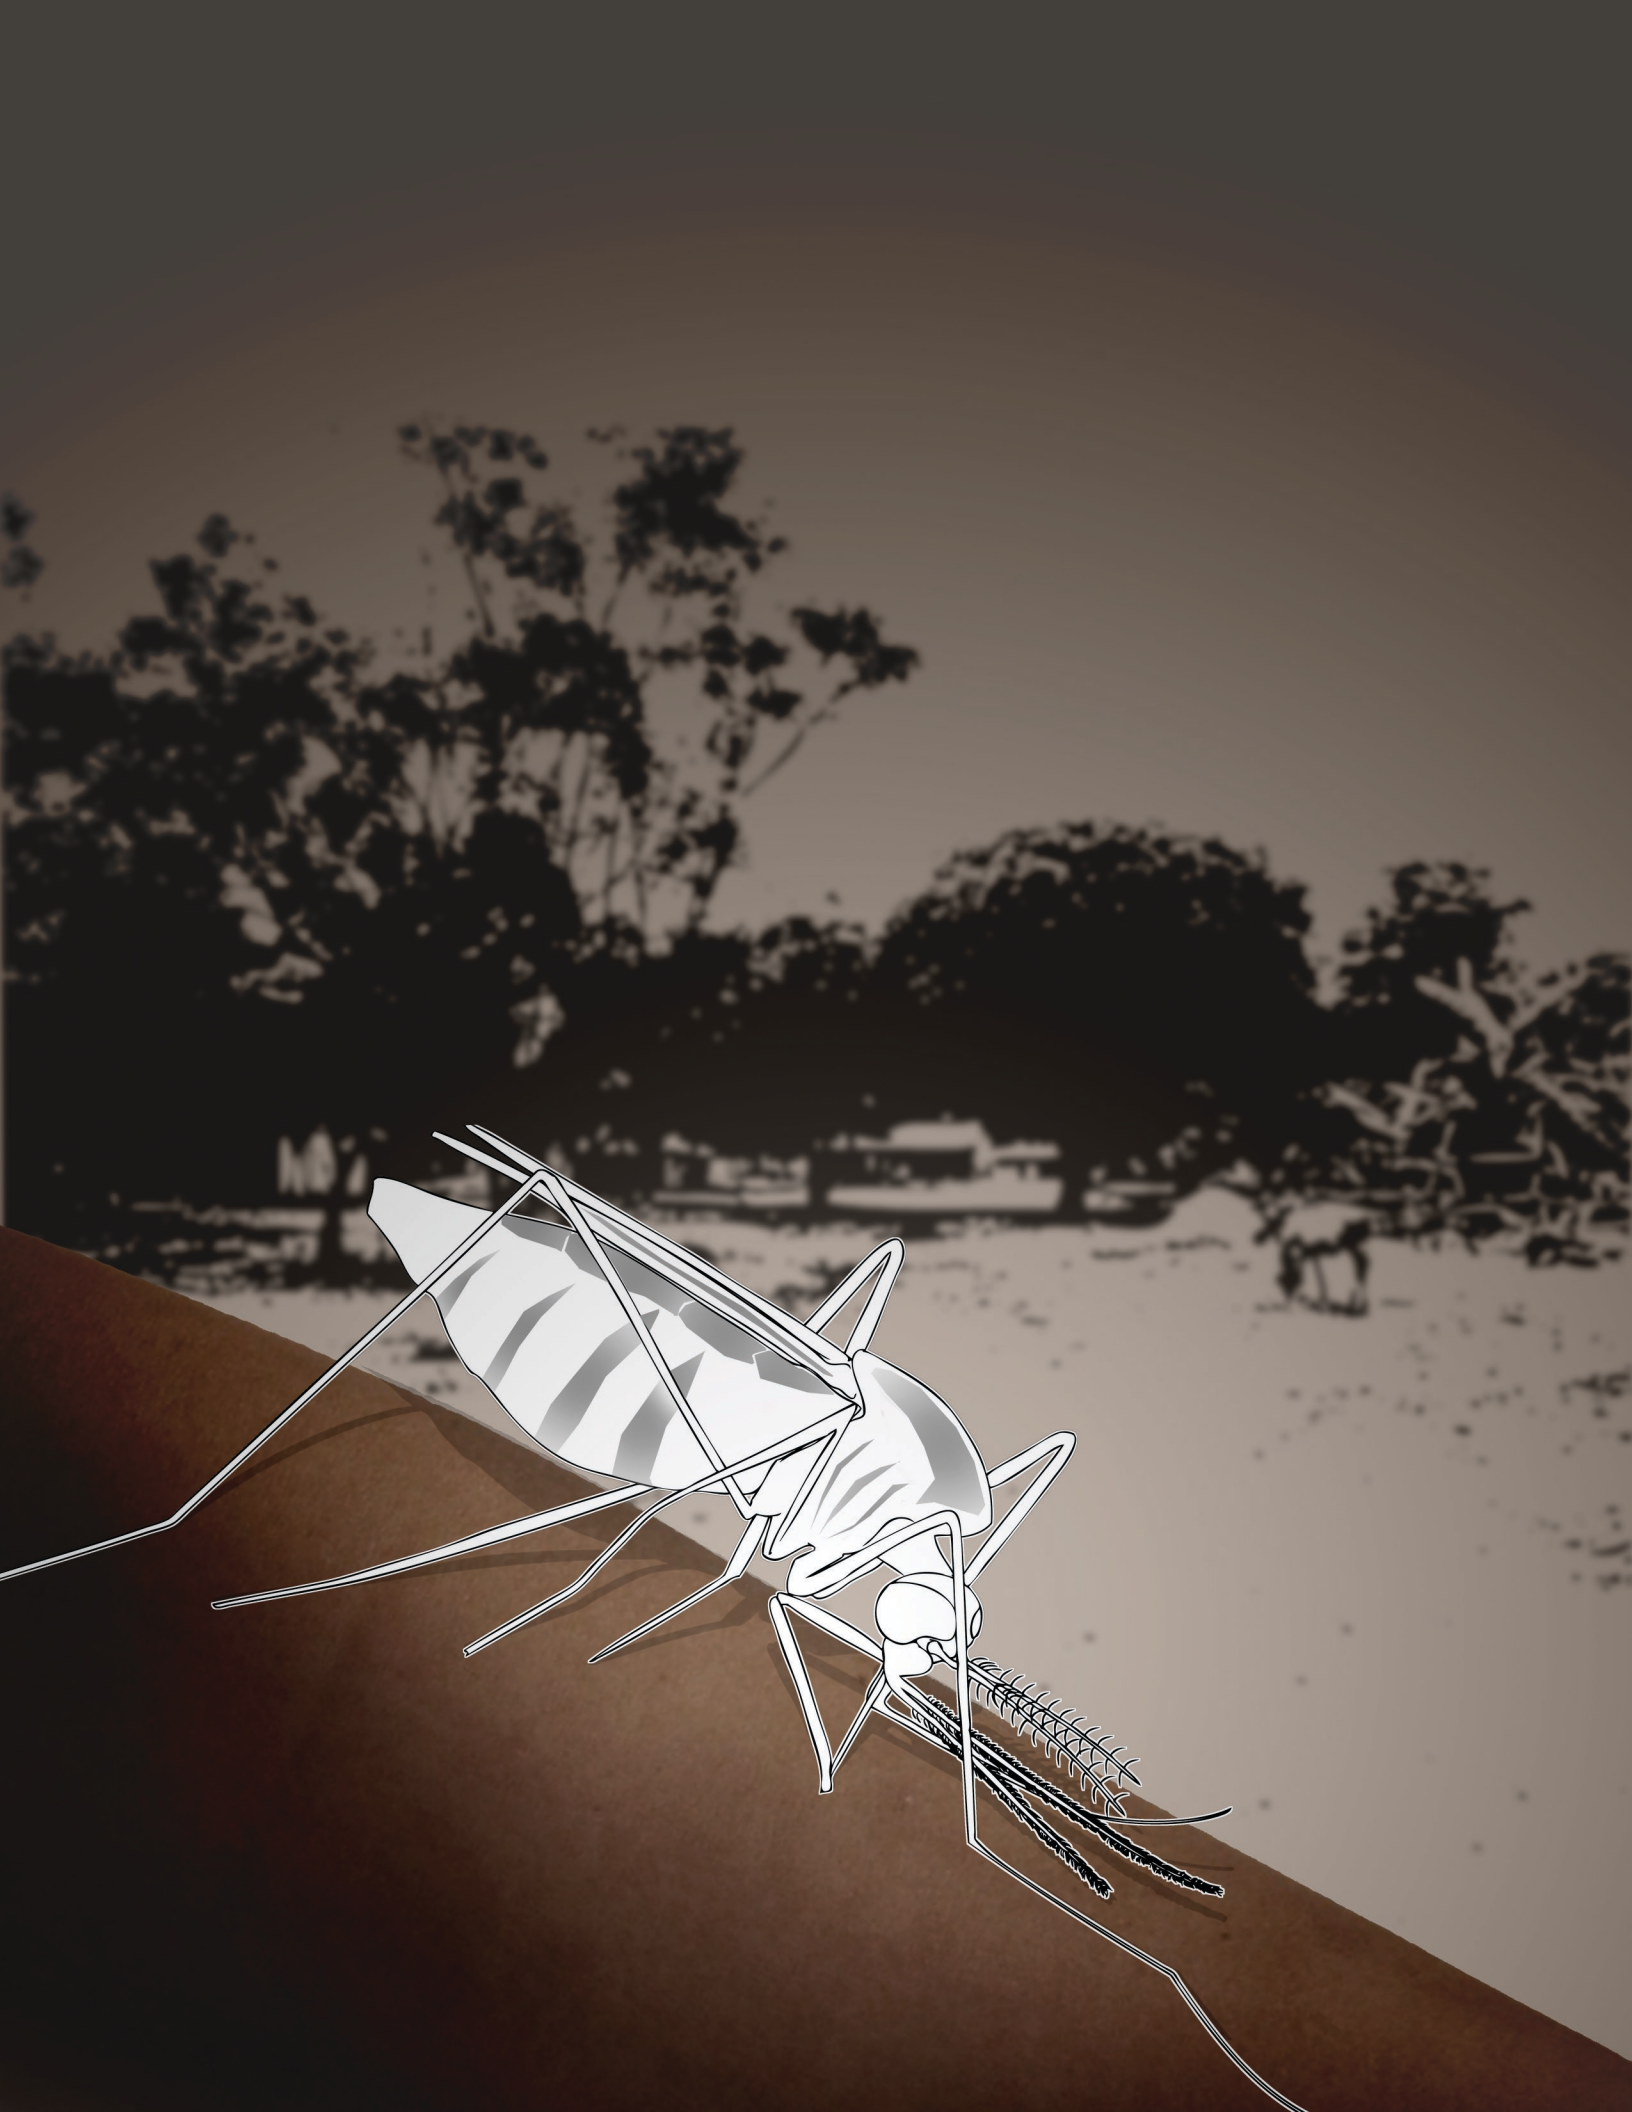

Supplement: NIHMS313006-supplement-7.pdf [file NIHMS313006-supplement-7.pdf]

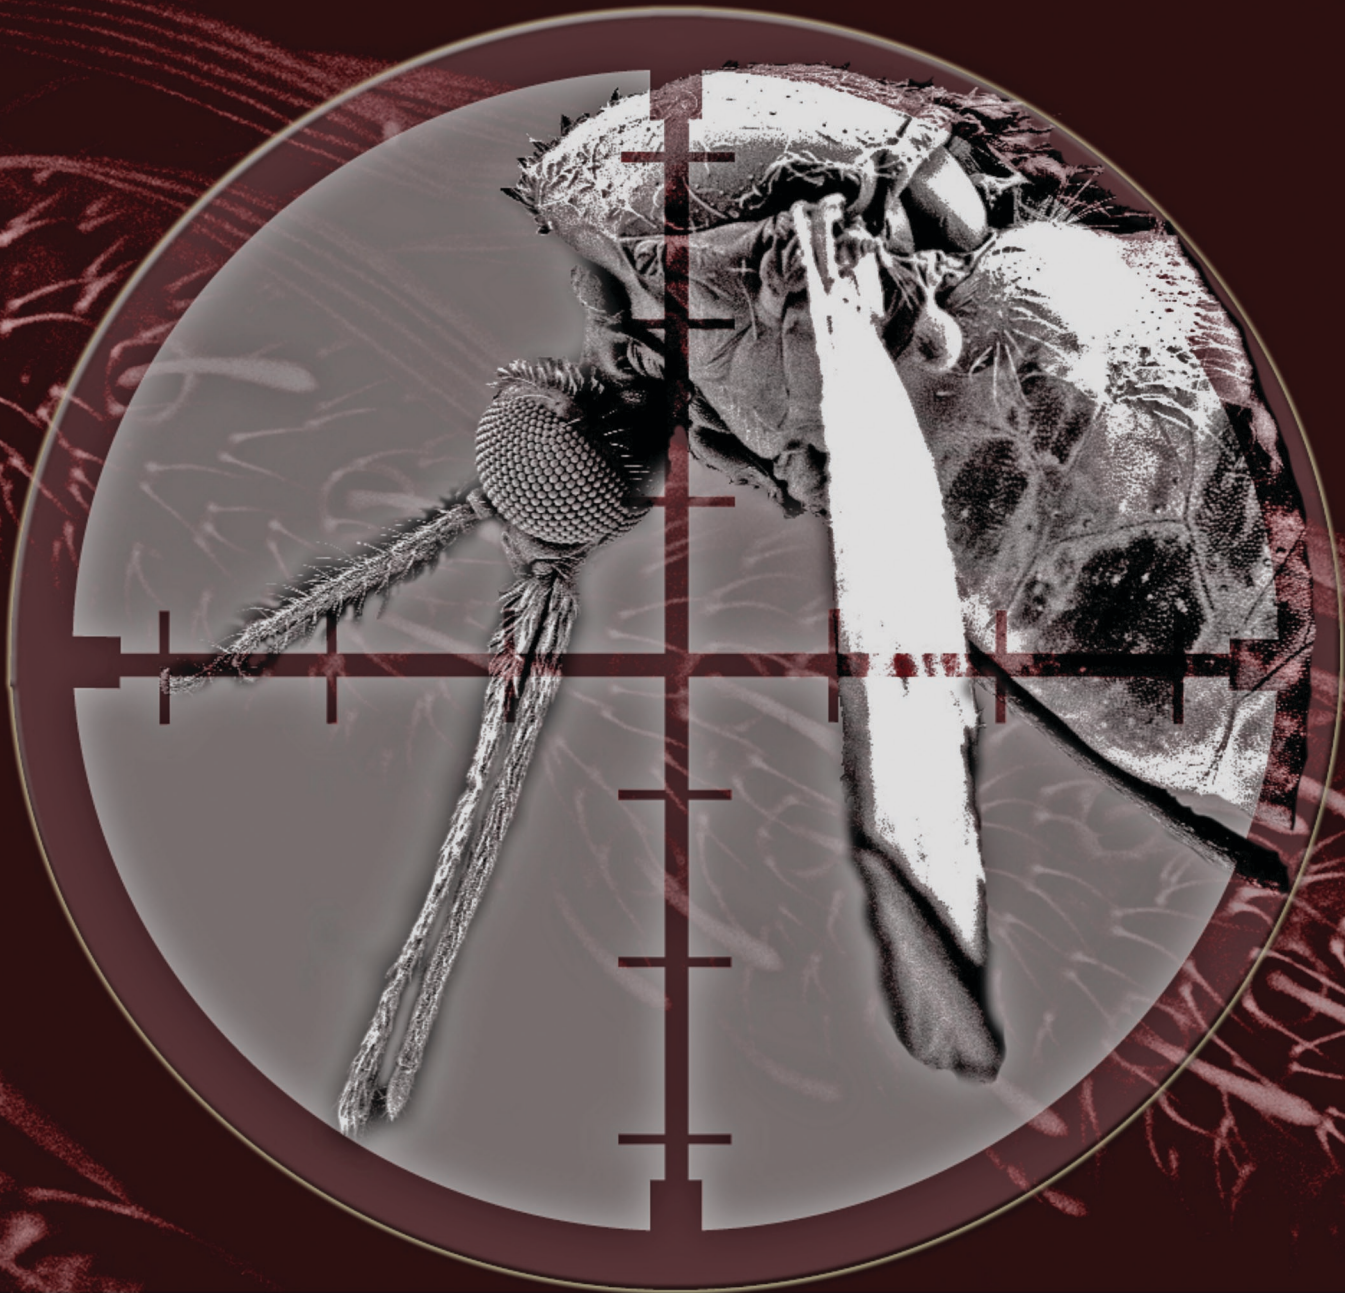

Supplement: NIHMS313006-supplement-8.pdf [file NIHMS313006-supplement-8.pdf]
